# Supplementary material for: Clinical Characteristics and Outcomes of S. Aureus Bacteremia in Patients Receiving Total Parenteral Nutrition
Source: MDPI journal article supplement (doi:10.3390/nu12103131), 2020-10-14
Supplement: s1 [file s1]

***Supplementary Appendix***

Clinical characteristics and outcomes of *S. aureus* bacteremia in patients receiving total parenteral nutrition.

**M Gompelman1 , RAM Tuinte1, MAH Berrevoets2, CP Bleeker-Rovers2, GJA Wanten1**1

1 Intestinal Failure Unit, Department of Gastroenterology and Hepatology, Radboud university medical center, Nijmegen, the Netherlands.

2 Department of Internal Medicine, Division of Infectious Diseases, Radboud university medical center, Nijmegen, the Netherlands.

* Corresponding author. Intestinal failure unit, Department of Gastroenterology and Hepatology,

Radboud university medical center, Geert Grooteplein Zuid 10, 6500HB, Nijmegen, the Netherlands.

**Appendix** A

| Central Line Associated Blood Stream Infection (CLABSI) | According to the Centers for Disease control and Prevention (CDC) [29] |
| --- | --- |
| Community acquisition of SAB | SAB cases were community-acquired in all cases that did not meet the definition of healthcare associated SAB or hospital acquired SAB, thus infection in a patient who has had no contact with the health care system within the last 90 days. |
| Complicated SAB | Presence of any of the following [14]:  - infective endocarditis;  - metastatic infection;  - non-retainable infected foreign body material;  - relapse < 3 months |
| Contamination | Contamination was defined as only one positive blood culture and no clinical signs of infection. |
| Exit site infection | An exit site infection is defined as an infection at the catheter exit site, with local erythema, induration and/or tenderness around the catheter exit site, and/or purulent discharge from the catheter exit site. When an exit site culture was performed and it was positive for S. aureus, it was labeled ‘definite’. Without an exit site culture, it was labeled ‘probable’ [22] |
| Healthcare associated SAB | SAB cases were healthcare-associated when patients were receiving home and/or ambulatory intravenous therapy, chemotherapy, hemodialysis, when patients were admitted in a hospital for at least 48 hours within the last 90 days; and patients residing in a nursing home or long-term care facility [30]. |
| Hospital acquired SAB | SAB cases were labeled hospital-acquired if patients had been admitted for at least 48 hours before the first positive blood culture. |
| Onset of SAB | The first positive blood culture was defined as the onset of SAB. |
| Portal of entry for SAB | The site that was most likely responsible for entry of *S. aureus* into the bloodstream, based on clinical signs, microbiological cultures and imaging results. |
| *Staphylococcus aureus* bacteremia (SAB) | At least one positive blood culture for *Staphylococcus aureus* combined with clinicals signs of infection. |
| Time of delay between onset of SAB and adequate treatment | The onset of clinical symptoms (fever, chills) was used to define the time of delay between onset of SAB and starting of adequate treatment. |

**Table A1. Additional definitions**
